# Supplementary material for: Enhancement in catalytic proton reduction by an internal base in a diiron pentacarbonyl complex: its synthesis, characterisation, inter-conversion and electrochemical investigation
Source: Royal Society of Chemistry journal article supplement (doi:10.1039/c6dt04409c), 2017-01-01
Supplement: c6dt04409c1.pdf [file c6dt04409c1.pdf]

## Electronic Supplementary Information

### **Enhancement in catalytic proton reduction by an internal base in a diiron pentacarbonyl complex: its synthesis, characterisation, inter-conversion and electrochemical investigation**

Zhimei Li,<sup>1</sup> Zhiyin Xiao,<sup>2</sup> Fenfen Xu,<sup>1</sup> Xianghua Zeng,<sup>2</sup> and Xiaoming Liu\*<sup>2</sup>

<sup>1</sup>School of Chemistry, Nanchang University, Nanchang 330031, China

<sup>2</sup>College of Biological, Chemical Sciences and Engineering, Jiaxing University,  
Jiaxing 314001, China

Email: [xiaoming.liu@mail.zjxu.edu.cn](mailto:xiaoming.liu@mail.zjxu.edu.cn); [xiaoming.liu@ncu.edu.cn](mailto:xiaoming.liu@ncu.edu.cn)

Tel./Fax: +86 (0)573 83643937

## 1 Synthesis of the ligand (H<sub>2</sub>L)

### 1.1 2-methyl-2-(pyridin-2-yl) propane-1, 3-diol

A mixture of 2-ethylpyridine (15 mL, 14.06 g, 0.131 mol) and an aqueous solution of formaldehyde (40%, 45 mL, 0.653 mol) was heated at 135 °C for 40 h in an autoclave. After being cooled down to room temperature, the solution was extracted with ethyl acetate (20 mL × 3). The organic phase was washed with saturated aqueous NaCl solution (3 × 20 mL) and dried with anhydrous Na<sub>2</sub>SO<sub>4</sub>. A brown oily liquid was accrued after the removal of the solvent under vacuum, in which there were three components, the starting material, monohydroxymethylated and the desired dihydroxymethylated as indicated by TLC. The crude product was purified with flash chromatography using gradient eluents. The starting material was first washed out using a mixture of ethyl acetate, n-hexane and ethanol at a ratio of 10:5:1. Then the eluting ratio was switched to 10:3.3:1 to successively elute the monohydroxymethylated, and then the dihydroxymethylated components. The former was collected as a yellow oily liquid and the latter as an orange viscous oily liquid (6.5 g, yield: 30%). <sup>1</sup>H NMR(CDCl<sub>3</sub>, ppm): 1.33 (s, 3H), 4.05 (s, 4H), 4.81 (t, 2H, J = 6.0 Hz), 7.22 (t, 2H, J = 2.76 Hz), 7.72 (s, H), 8.48 (s, H). <sup>13</sup>C NMR (CDCl<sub>3</sub>, ppm): 18.5, 43.8, 75.6, 121.8, 137.0, 148.2, 165.1. MS (EI): (M+1)/z = 168.2. Micro analysis (%) for C<sub>9</sub>H<sub>13</sub>NO<sub>2</sub> (167.21), calculated (found): C, 64.65 (64.99); H, 7.84 (7.98); N, 8.38 (7.32).

### 1.2 2-methyl-2-(pyridin-2-yl) propane-1, 3-diyl-bis (4-methylbenzenesulfonate)

To an ice-bath pre-cooled solution of 2-methyl-2-(pyridin-2-yl)propane-1,3-diol (3.81 g, 0.023 mol) in pyridine (20 mL) was dropwise added a solution of toluenesulfonyl chloride (10.88 g, 0.057 mol) in pyridine (15 mL) through a pressure-equalized dropping funnel. The reaction was stirred at ambient temperature overnight and quenched with ice (45 g). When the ice melted, a white solid (7.2 g, yield: 66%) was isolated, washed with water (3 × 8 mL), diethyl ether (2 × 8 mL) and dried in vacuum. FTIR (nujol)  $\nu_{S=O}$ : 1374.1, 1260.9  $\text{cm}^{-1}$ .  $^1\text{H}$  NMR ( $\text{CDCl}_3$ , ppm): 1.30 (s, 3H), 2.45 (s, 6H), 4.27 (s, 4H), 7.15 (m, 2H), 7.27 (d, 4H,  $J = 8$  Hz), 7.60 (d, 1H,  $J = 8$  Hz), 7.63 (d, 4H,  $J = 5.6$  Hz), 8.34 (d, 1H,  $J = 4.4$  Hz).  $^{13}\text{C}$  NMR ( $\text{CDCl}_3$ , ppm): 19.5, 21.7, 44.9, 72.8, 121.5, 129.8, 134.5, 144.8, 148.9, 159.3. MS (ES): (M+1) / z = 476.3. Microanalysis (%) for  $\text{C}_{23}\text{H}_{25}\text{NO}_6\text{S}_2$  (475.58), calculated (found): C, 58.09 (58.03); H, 5.30 (5.38); N, 2.92 (3.07); S, 13.48 (13.63).

### 1.3 2-(2-methyl-1, 3-dithiocyanatopropan-2-yl) pyridine

A mixture of 2-methyl-2-(pyridin-2-yl) propane-1, 3-diyl-bis (4-methylbenzenesulfonate) (0.90 g, 1.89 mmol) and KSCN (2.2 g, 22.8 mmol) was suspended in DMF (8 mL). The reaction was heated at 110 °C for 4 h under stirring. Part of the solvent was removed on hot to give a paste which was dissolved in water

(7 mL). The mixture was repeatedly extracted using ethyl acetate (10 mL × 5). The organic phase was combined and dried with anhydrous Na<sub>2</sub>SO<sub>4</sub>. After the removal of the solvent, the crude product was purified by flash chromatography using a mixture of ethyl acetate (40%) and n-hexane (60%) as eluent. A pale yellow solid (0.2 g, 50%) was collected and dried with anhydrous Na<sub>2</sub>SO<sub>4</sub> after the solvents were removed from the combined collected fractions containing the desired complex using rotary evaporator. FTIR (nujol)  $\nu_{\text{SCN}}$ : 2158.5 cm<sup>-1</sup>; <sup>1</sup>H NMR (CDCl<sub>3</sub>, ppm): 1.25 (s, 3H), 3.41 (s, 2H), 3.70 (s, 2H), 7.30 (t, 1H, J = 9.96 Hz), 7.40 (t, 1H, J = 6.16 Hz), 7.78 (d, 1H, J = 6.16 Hz), 8.63 (d, 1H, J = 3.28 Hz). <sup>13</sup>C NMR (CDCl<sub>3</sub>, ppm): 22.3, 44.3, 46.7, 112.8, 121.2, 123.2, 137.4, 149.1, 159.6. MS (EI): (M+1)/z = 250.03, (M-CN)/z = 222.97. Microanalysis (%) for C<sub>11</sub>H<sub>11</sub>N<sub>3</sub>S<sub>2</sub> (249.36), calculated (found): C, 52.98 (52.81); H, 4.45 (4.72); N, 16.85 (16.44).

#### 1.4 2-methyl-2-(pyridin-2-yl) propane-1,3-dithiol

To a pre-cooled (ice bath) suspension of LiAlH<sub>4</sub> (0.777 g, 0.02 mmol) in anhydrous diethyl ether (20 mL) was added 2-(2-methyl-1, 3-dithiocyanatopropan-2-yl)pyridine (1.276 g, 5.1 mmol) in small portions to avoid vigorous reaction. The reaction was refluxed at 45 °C under N<sub>2</sub> overnight. After being cooled down to ice temperature, an aqueous solution of NH<sub>4</sub>Cl (sat.) was added into the reaction with great care at the first a few drops of the saturated ammonium chloride solution to quench the reaction. The mixture was extracted with degassed ethyl acetate (20 mL × 4) and the organic

phase was combined and dried with dried with anhydrous  $\text{Na}_2\text{SO}_4$ . Removing the solvent under reduced pressure yielded a yellow oily liquid of pungent smell (0.95 g, 93%). FTIR (neat):  $\nu_{\text{SH}} = 2556.4 \text{ cm}^{-1}$ . MS (ES):  $(M+1)/z = 199.87$ .  $^1\text{H NMR}$  ( $\text{CDCl}_3$ , ppm): 1.18 (br, 2H, -SH), 1.43 (s, 3H, - $\text{CH}_3$ ), 2.83 (q, 2H, - $\text{CH}_2$ ), 3.08 (q, 2H, - $\text{CH}_2$ ), 7.09 (t,  $J = 3.42 \text{ Hz}$ , 1H, Py-H), 7.23 (d,  $J = 7.86 \text{ Hz}$ , 1H, Py-H), 7.59 (d,  $J = 7.44 \text{ Hz}$ , 1H, Py-H), 8.53 (d,  $J = 4.24 \text{ Hz}$ , 1H, Py-H). In practice, the ligand was used for next step reaction without further purification.

## 2. Tables and figures.

**Table S1** X-ray crystallographic details of complexes **1** and **2H<sup>+</sup>**.

|                                             | <b>1</b>                                                                       | <b>2H<sup>+</sup></b>                                                                          |
|---------------------------------------------|--------------------------------------------------------------------------------|------------------------------------------------------------------------------------------------|
| Empirical formula                           | C <sub>14</sub> H <sub>11</sub> Fe <sub>2</sub> NO <sub>5</sub> S <sub>2</sub> | C <sub>15</sub> H <sub>12</sub> Fe <sub>2</sub> NO <sub>6</sub> S <sub>2</sub> BF <sub>4</sub> |
| M <sub>w</sub>                              | 449.06                                                                         | 564.89                                                                                         |
| Crystal system                              | Monoclinic                                                                     | Monoclinic                                                                                     |
| Space group                                 | P 21/n                                                                         | P 21/c                                                                                         |
| <i>a</i> / Å                                | 9.5512(6)                                                                      | 14.5080(4)                                                                                     |
| <i>b</i> / Å                                | 11.9757(8)                                                                     | 11.7408(3)                                                                                     |
| <i>c</i> / Å                                | 14.9165(10)                                                                    | 13.0329(4)                                                                                     |
| <i>α</i> / °                                | 90                                                                             | 90                                                                                             |
| <i>β</i> / °                                | 93.128(1)                                                                      | 108.12                                                                                         |
| <i>γ</i> / °                                | 90                                                                             | 90                                                                                             |
| <i>V</i> / Å <sup>3</sup>                   | 1703.64(19)                                                                    | 2109.86(10)                                                                                    |
| <i>Z</i>                                    | 4                                                                              | 4                                                                                              |
| <i>T</i> / K                                | 298                                                                            | 298                                                                                            |
| Density <sub>cal</sub> / g·cm <sup>-3</sup> | 1.751                                                                          | 1.778                                                                                          |
| Crystal description                         | Block                                                                          | Block                                                                                          |
| Crystal colour                              | Dark green                                                                     | Dark red                                                                                       |
| Crystal size / mm                           | 0.39 × 0.34 × 0.12                                                             | 0.28 × 0.22 × 0.22                                                                             |
| <i>μ</i> / mm <sup>-1</sup>                 | 1.971                                                                          | 1.640                                                                                          |
| <i>F</i> [000]                              | 904.0                                                                          | 1128.0                                                                                         |

**Table S2** Frequencies of carbonyl groups in two hydride complexes in dichloromethane.

| Formula                                                                                                                                          | structure                                                                          | Frequencies (cm <sup>-1</sup> ) |
|--------------------------------------------------------------------------------------------------------------------------------------------------|------------------------------------------------------------------------------------|---------------------------------|
| [Fe <sub>2</sub> (μ-H){(SCH <sub>2</sub> ) <sub>2</sub> C(CH <sub>3</sub> )(2-Py)}(CO) <sub>5</sub> ] <sup>+</sup><br>(1H <sup>+</sup> )         | 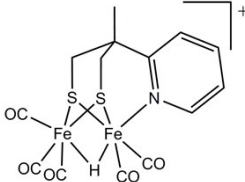 | 2114, 2064,<br>2023             |
| [Fe <sub>2</sub> (μ-H){(SCH <sub>2</sub> ) <sub>2</sub> C(CH <sub>3</sub> )(2-CH <sub>2</sub> NH <sub>2</sub> )}(CO) <sub>5</sub> ] <sup>+</sup> |  | 2111, 2056,<br>2009             |

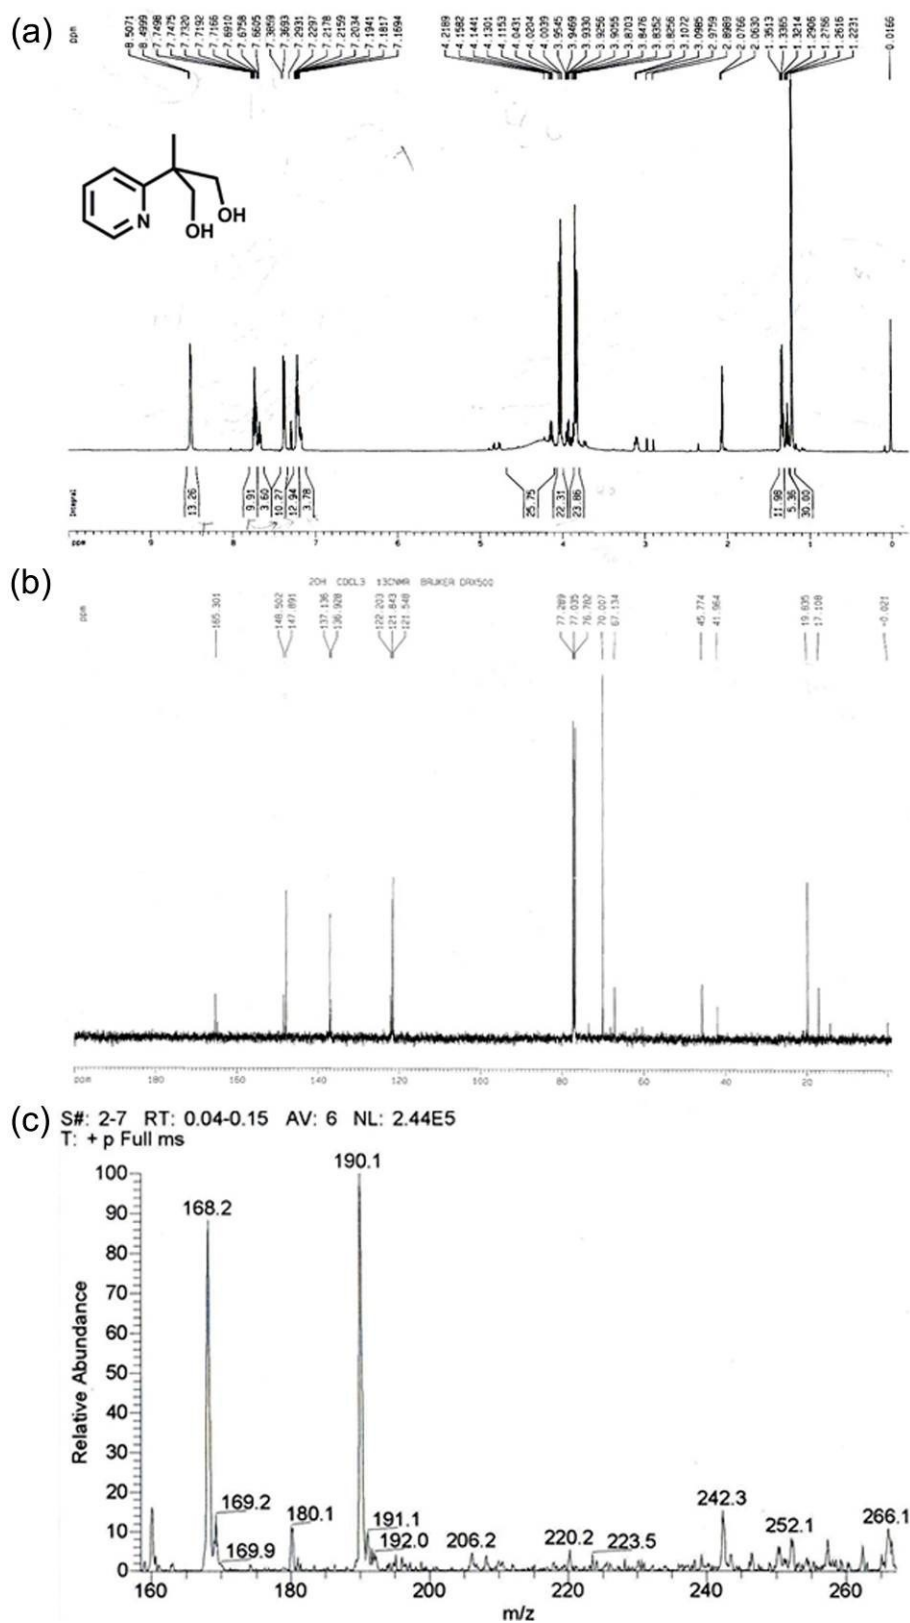

**Fig. S1** Characterizations of 2-methyl-2-(pyridin-2-yl)propane-1,3-diol: (a) <sup>1</sup>H NMR, (b) <sup>13</sup>C NMR, and (c) MS spectra.



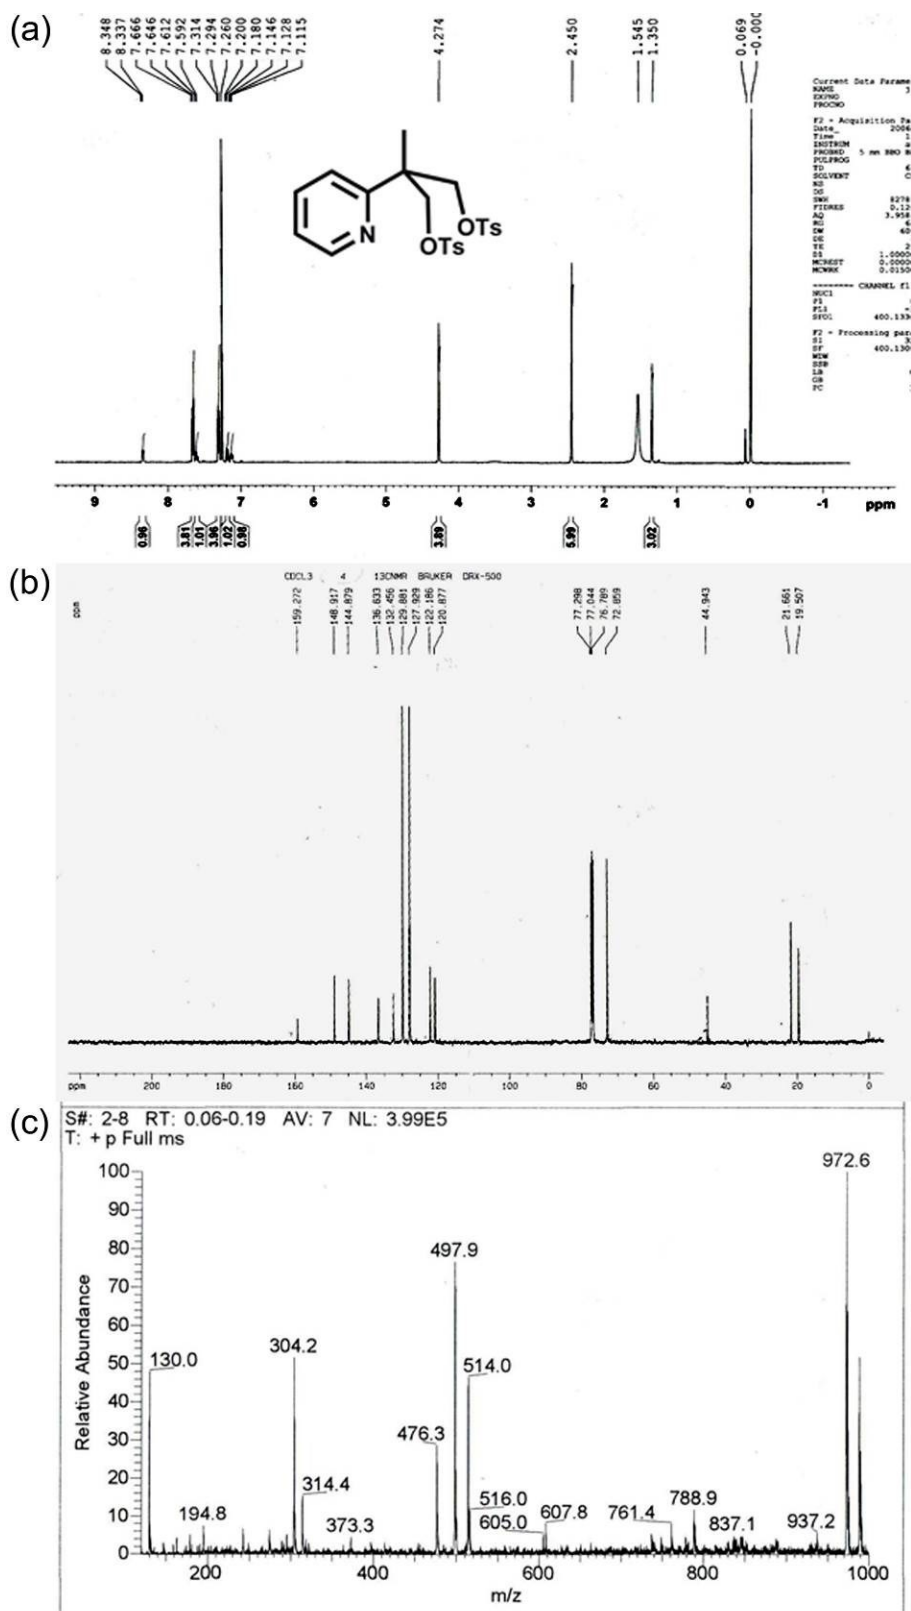

**Fig. S2** Characterizations of 2-methyl-2-(pyridin-2-yl) propane-1, 3-diyl-bis (4-methylbenzenesulfonate): (a) <sup>1</sup>H NMR, (b) <sup>13</sup>C NMR, and (c) MS spectra.

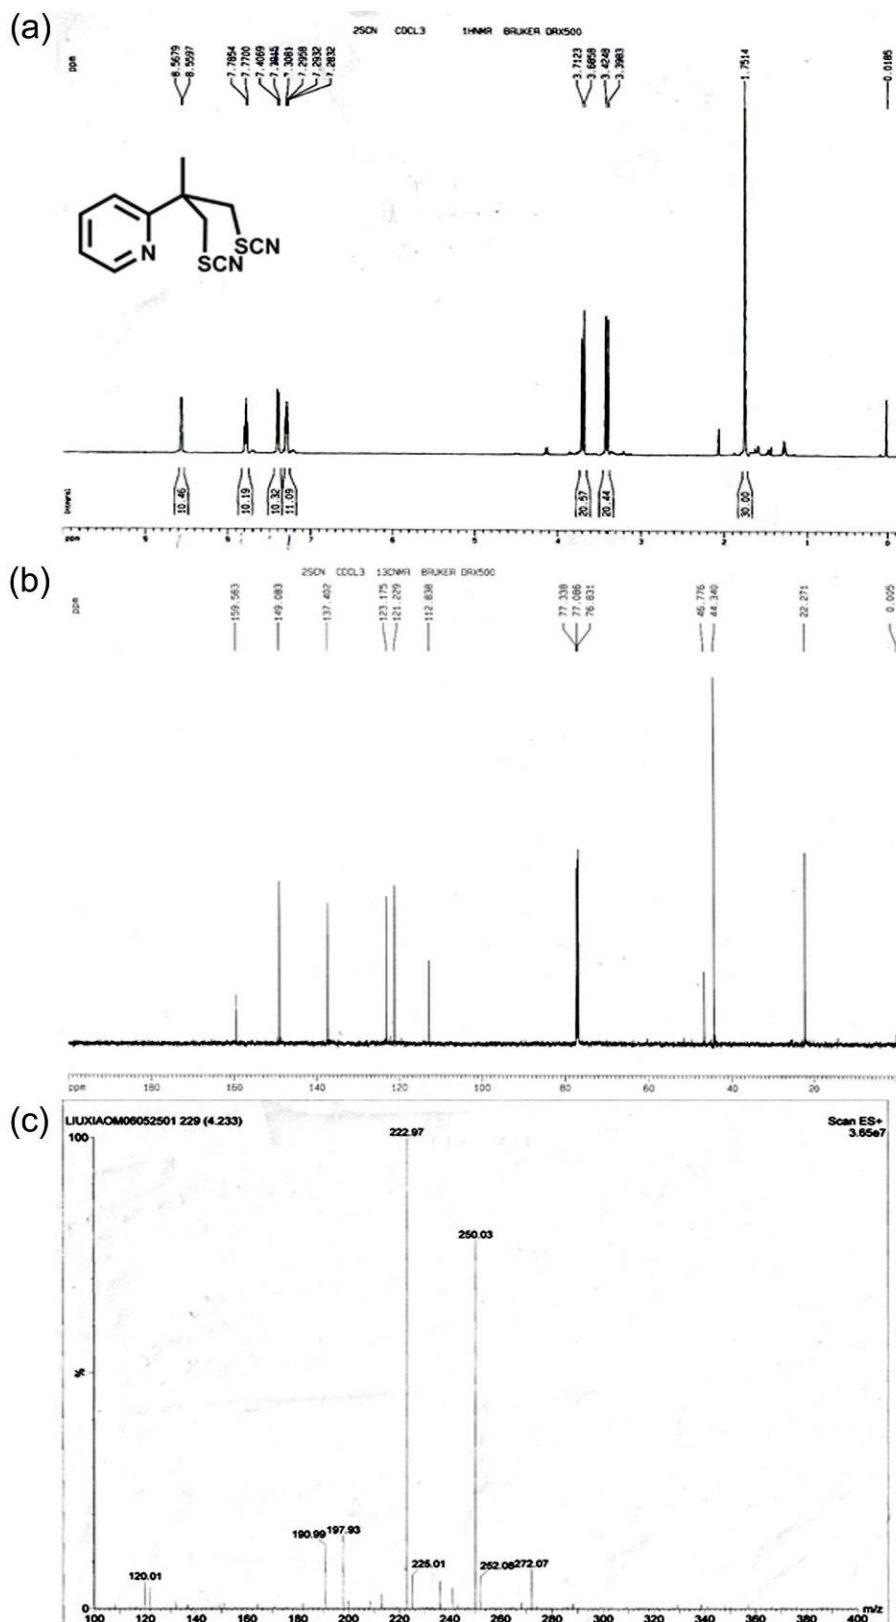

**Fig. S3** Characterizations of 2-(2-methyl-1,3-dithiocyanatopropan-2-yl)pyridine: (a) <sup>1</sup>H NMR, (b) <sup>13</sup>C NMR, and (c) MS spectra.

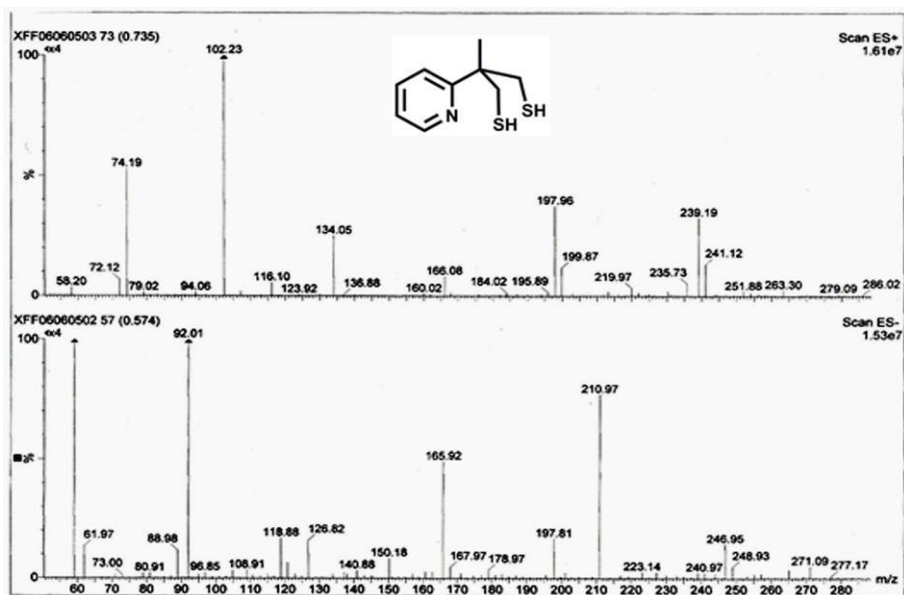

**Fig. S4** Characterizations of 2-methyl-2-(pyridin-2-yl) propane-1,3-dithiol: MS spectra.

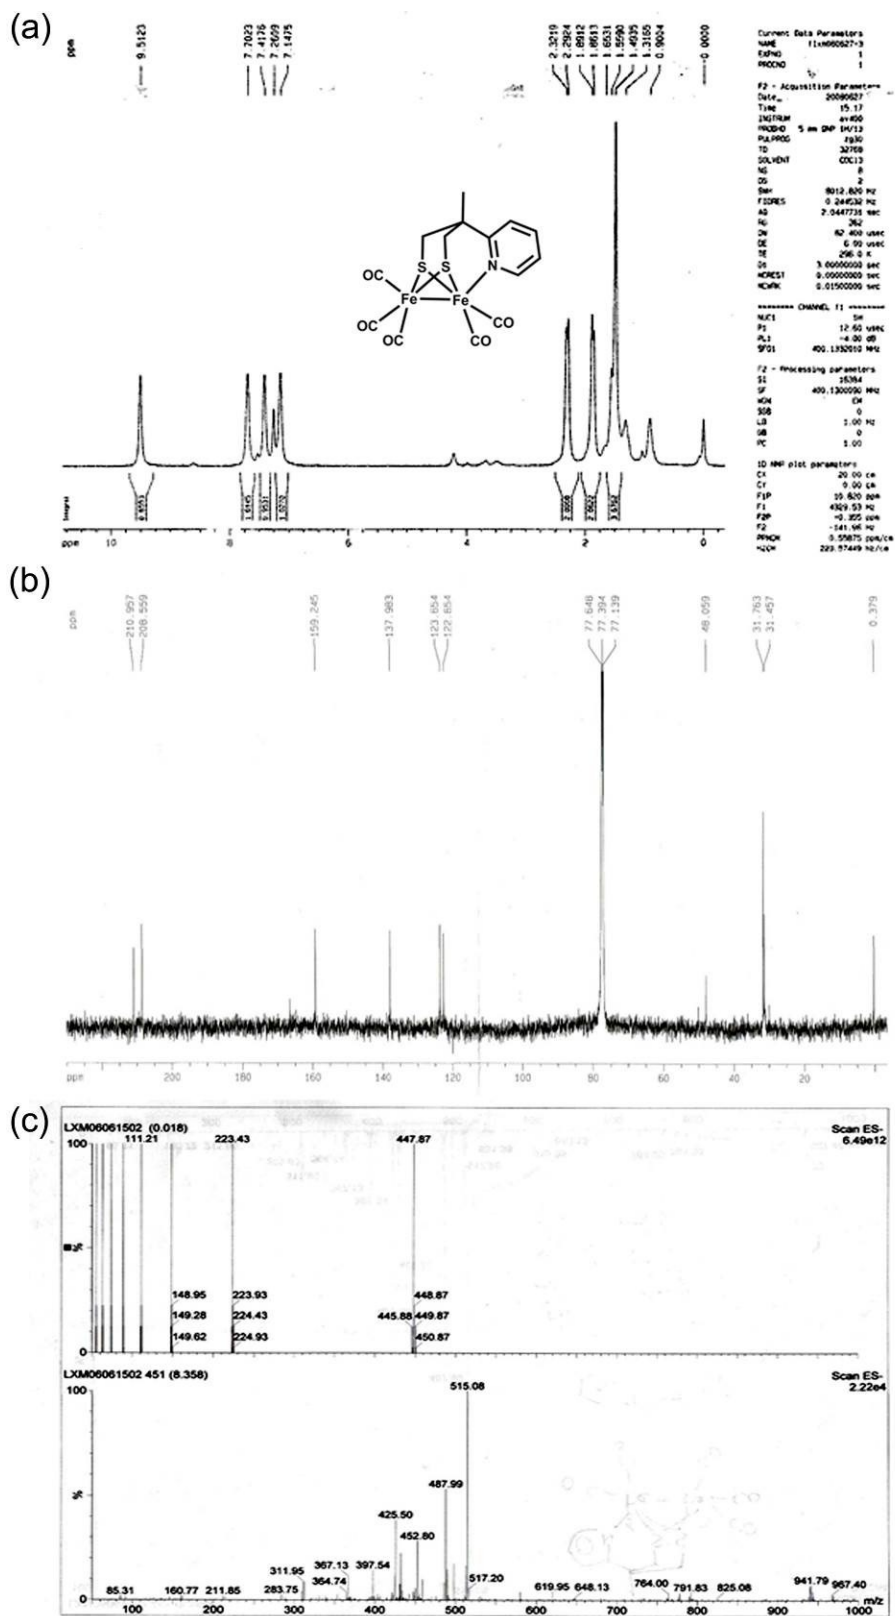

**Fig. S5** Characterizations of complex 1: (a) <sup>1</sup>H NMR, (b) <sup>13</sup>C NMR, and (c) MS spectra.

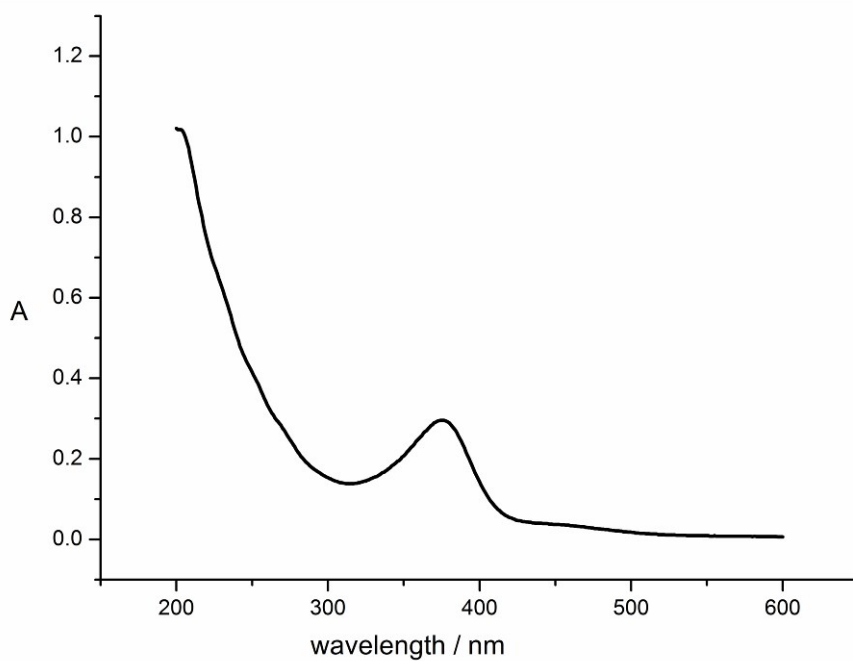

**Fig. S6** UV-Vis spectrum of complex **1** in MeCN.

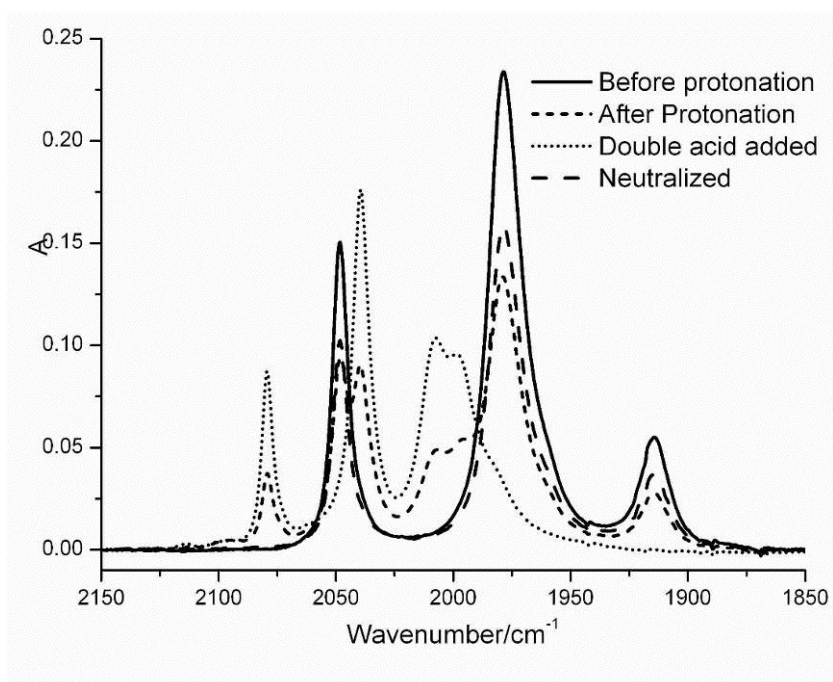

**Fig. S7** FTIR spectra of reactions both protonation of complex **1** and *in-situ* deprotonation of complex **2H<sup>+</sup>** in acetonitrile solution under N<sub>2</sub> atmosphere at room temperature.

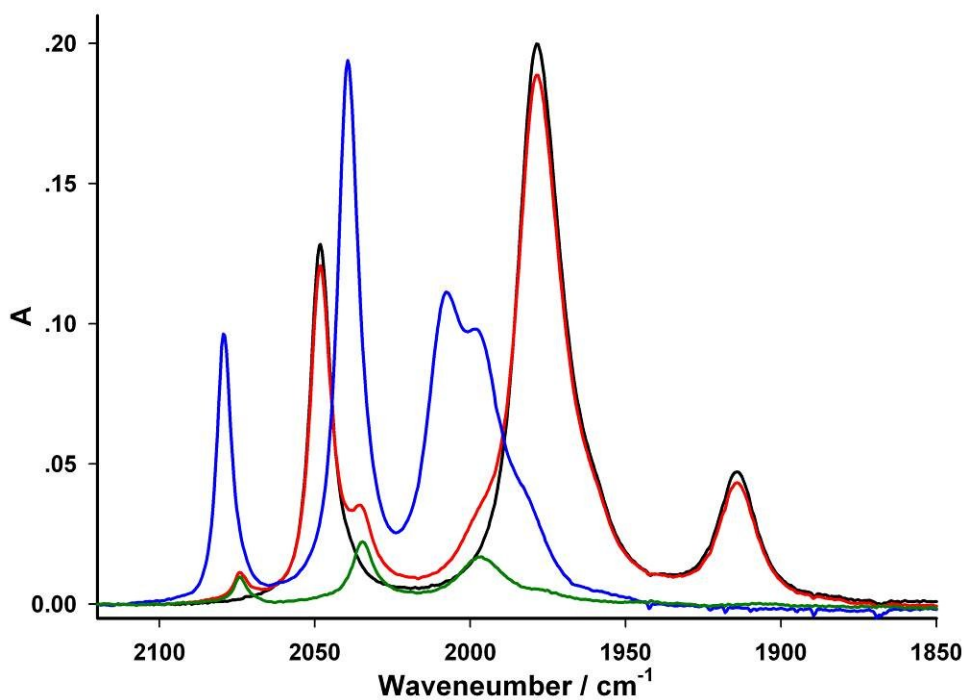

**Fig. S8** FTIR spectra of the complexes in MeCN: **1** under N<sub>2</sub> (black) / CO (1 atm., red), **2H**<sup>+</sup> (blue) and **2** (green) abstracted from the spectrum (red) of complex **1** under CO.

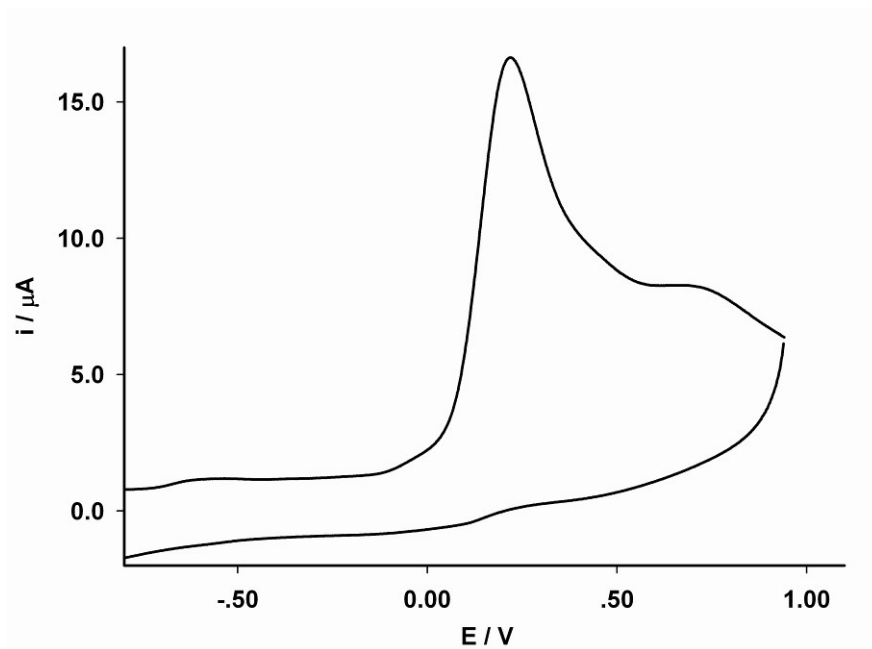

**Fig. S9** Oxidation process of complex **1** (3.2 mmol L<sup>-1</sup>) in DCM ( $v = 0.1 \text{ mV s}^{-1}$ ,  $T = 298 \text{ K}$ ).

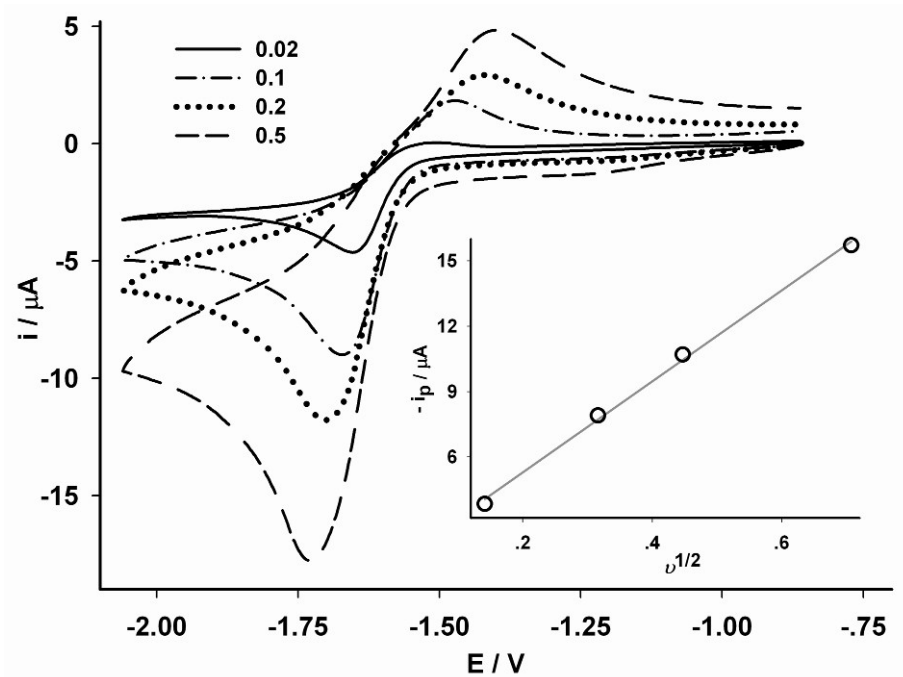

**Fig. S10** Cyclic voltammograms of complex **1** (2.5 mmol L<sup>-1</sup>) at various scanning rates (V s<sup>-1</sup>) under CO atmosphere (Inset: the plot of the reduction peak current *versus* the square-root of the scanning rate).

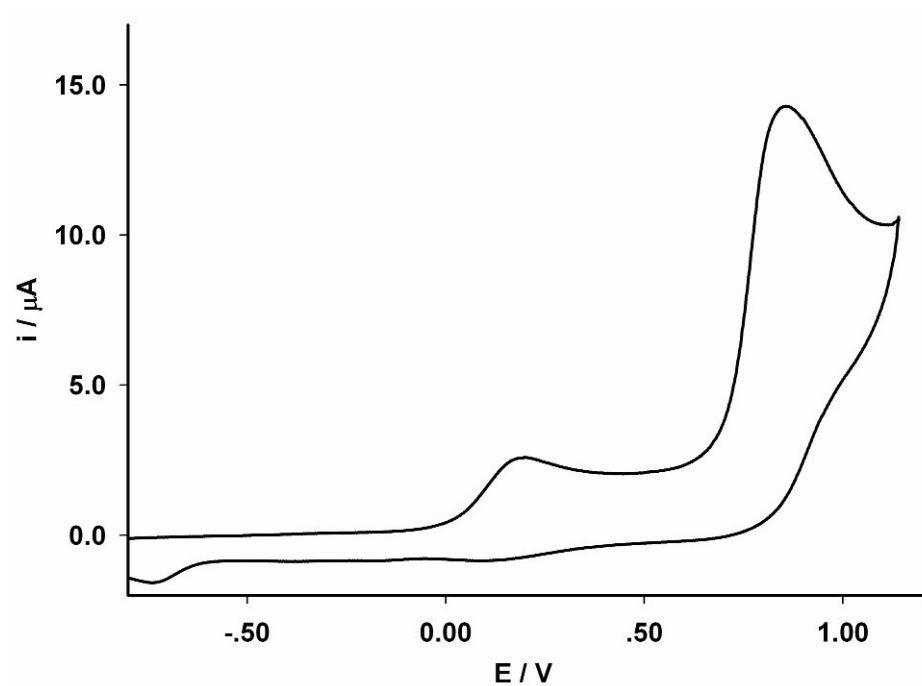

**Fig. S11** Oxidation processes of complex **2H<sup>+</sup>** (3.2 mmol L<sup>-1</sup>) in DCM ( $v = 0.1 \text{ mV s}^{-1}$ ,  $T = 298 \text{ K}$ ).

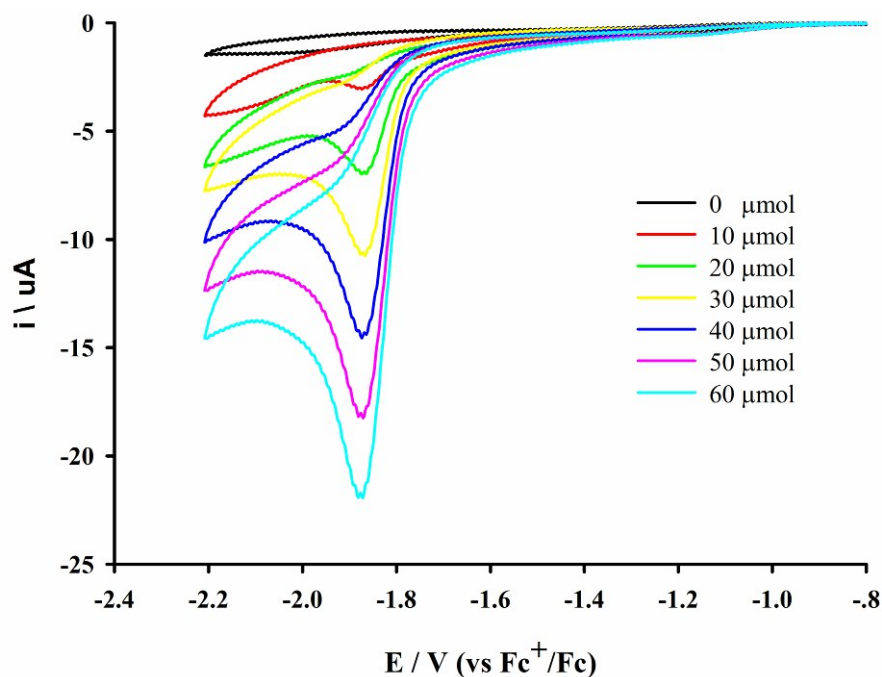

**Fig. S12** Electrochemical responses of vitreous carbon disk ( $\phi = 1$  mm) with the addition of lutidinium (1 equivalent  $\sim 10$   $\mu\text{mol}$ ) under Ar atmosphere in DCM at the scanning rate of  $0.1$   $\text{Vs}^{-1}$  at  $298$  K.

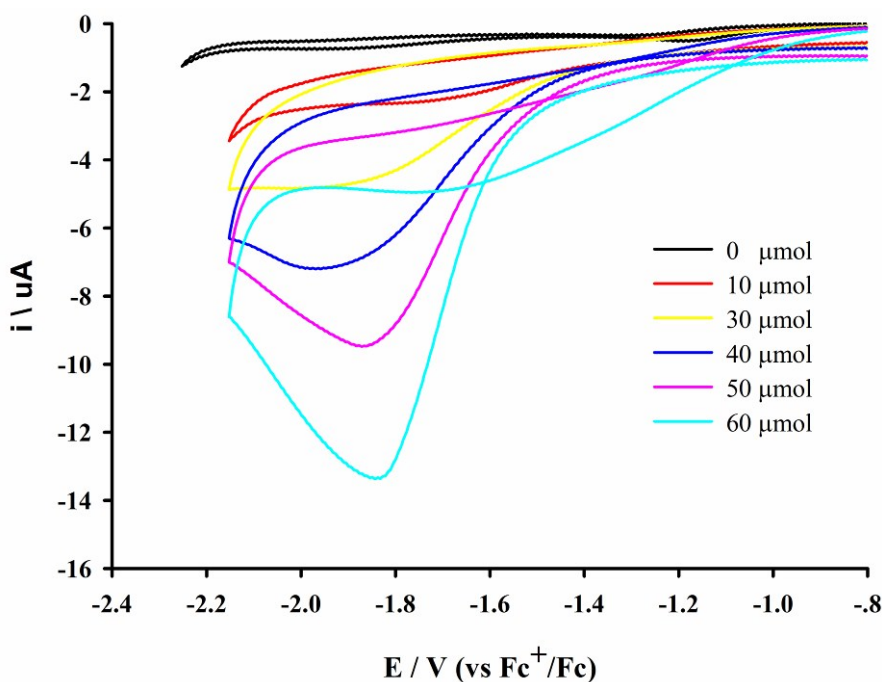

**Fig. S13** Electrochemical responses of vitreous carbon disk ( $\phi = 1$  mm) with the addition of  $\text{HBF}_4 \cdot \text{Et}_2\text{O}$  (1 equivalent  $\sim 10$   $\mu\text{mol}$ ) under Ar atmosphere in DCM at the scanning rate of  $0.1$   $\text{Vs}^{-1}$  at  $298$  K.



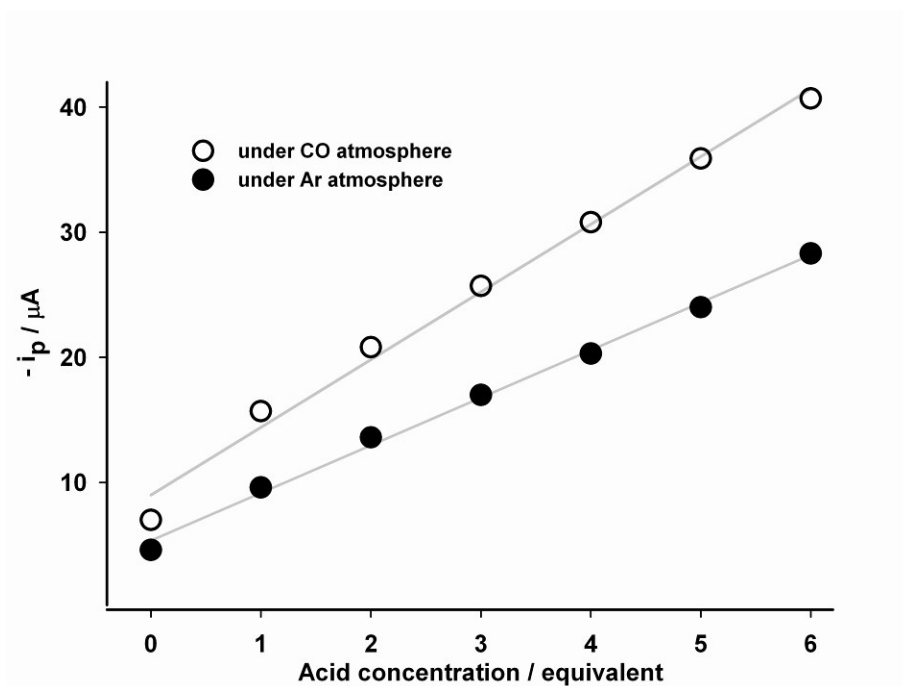

**Fig. S14** Peak current vs. the acid ( $\text{HBF}_4 \cdot \text{Et}_2\text{O}$ ) concentration for the first reduction process of complex  $2\text{H}^+$  under either CO or Ar atmosphere.
